# Supplementary material for: Microwave Control of Reynoutria japonica Houtt., Including Ecotoxicological Aspects and the Resveratrol Content in Rhizomes
Source: MDPI journal article supplement (doi:10.3390/plants13020152), 2024-01-05
Supplement: s1 [file s1]

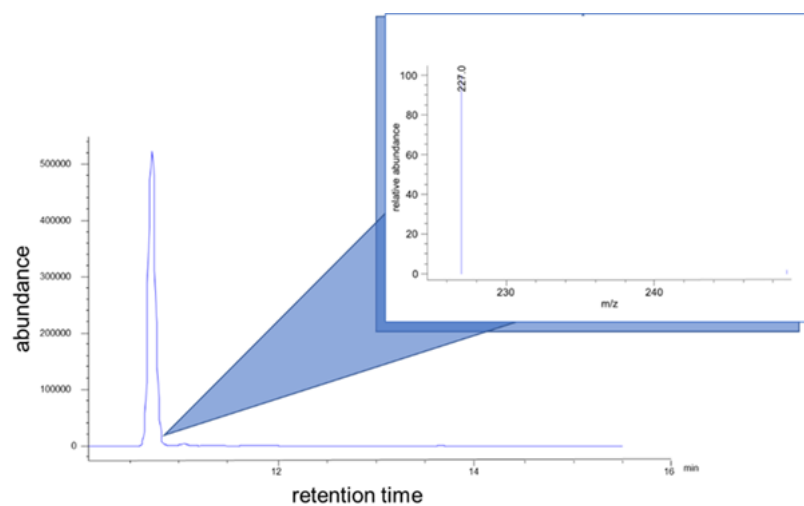

**Figure S1.** Extracted ion chromatogram (EIC) 227 with a relative mass spectrum of the trans-resveratrol peak.
